# Supplementary material for: Elucidating the Molecular Determinants of the Binding Modes of a Third-Generation HIV-1 Integrase Strand Transfer Inhibitor: The Importance of Side Chain and Solvent Reorganization
Source: MDPI journal article supplement (doi:10.3390/v16010076), 2024-01-02
Supplement: s1 [file s1]

Supporting Information for “Elucidating the  
molecular determinants of the binding modes of a  
third-generation HIV-1 integrase strand transfer  
inhibitor: The importance of side chain and solvent  
reorganization”

12/31/2023

*Qinfang Sun<sup>1</sup>, Avik Biswas<sup>2,3</sup>, Dmitry Lyumkis<sup>2,4</sup>, Ronald Levy<sup>1</sup>, Nanjie Deng<sup>5\*</sup>*

(1) Center for Biophysics and Computational Biology and Department of Chemistry,  
Temple University, Philadelphia, PA 19122

(2) The Salk Institute for Biological Studies, Laboratory of Genetics, La Jolla, CA 92037

(3) Department of Physics, University of California San Diego, La Jolla, CA, 92093

(4) Graduate schools for Biological Sciences, Section of Molecular Biology, University  
of California, San Diego, La Jolla, CA, 92093

(5) Department of Chemistry and Physical Sciences, Pace University, New York,  
NY10038

Table S1. RMSD in the positions of C-alpha atoms between the corresponding binding site residues (within 5 Å from any 4f atoms) in the HIV-1 and PFV intasomes. For the two DNA nucleotides that form part of the binding site, the corresponding deviations between the backbone C5' atoms are shown.

| Corresponding residue pairs | RMSD (Å) |
|-----------------------------|----------|
| N117(HIV)/Q186(PFV)         | 0.39     |
| Y143(HIV)/Y212(PFV)         | 0.36     |
| P145(HIV)/P214(PFV)         | 0.38     |
| Q146(HIV)/Q215(PFV)         | 0.42     |
| Q148(HIV)/S217(PFV)         | 0.41     |
| DNA: A36(HIV)/A16(PFV)      | 0.43     |
| DNA: C35(HIV)/C17(PFV)      | 1.06     |

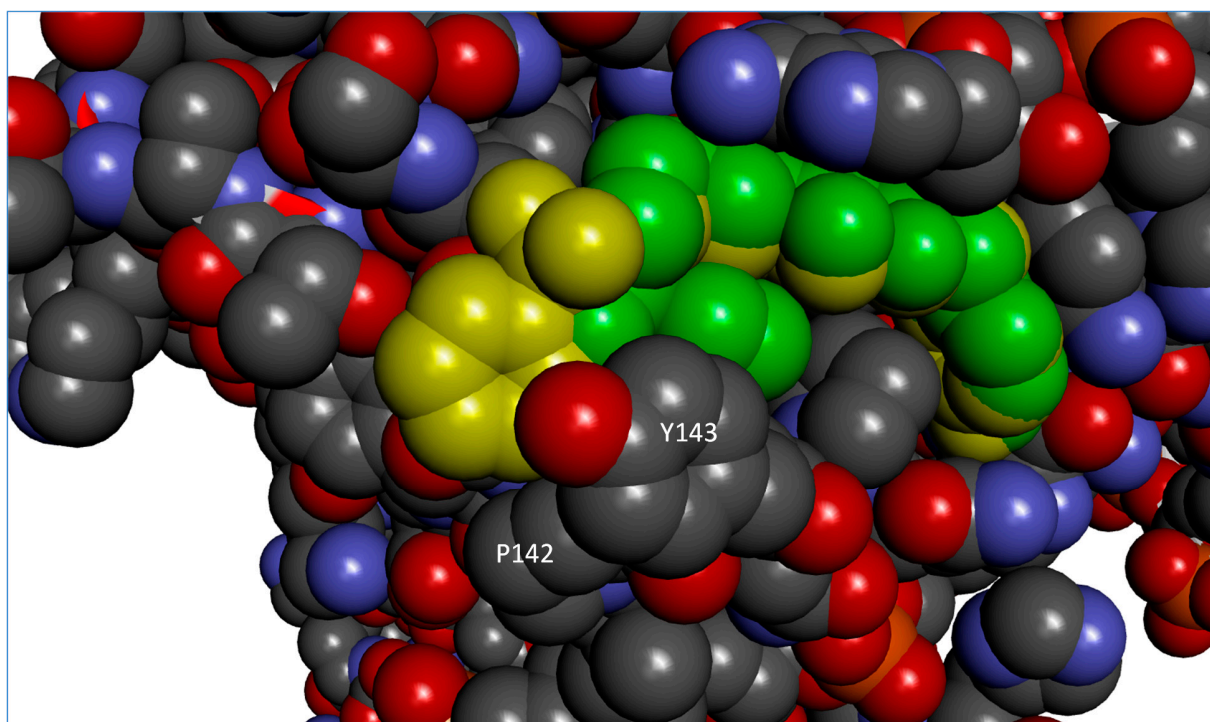

*Figure S1. Extended (yellow) and bent (green) 4f in the binding site of HIV-1 intasome. To facilitate a conformational transition between the two binding conformations requires both side chain atoms from the protein residues P142 and Y143 to rearrange to avoid steric clash with the sulfonylphenyl moiety of 4f converting from the extended to the bent conformation and vice versa.*

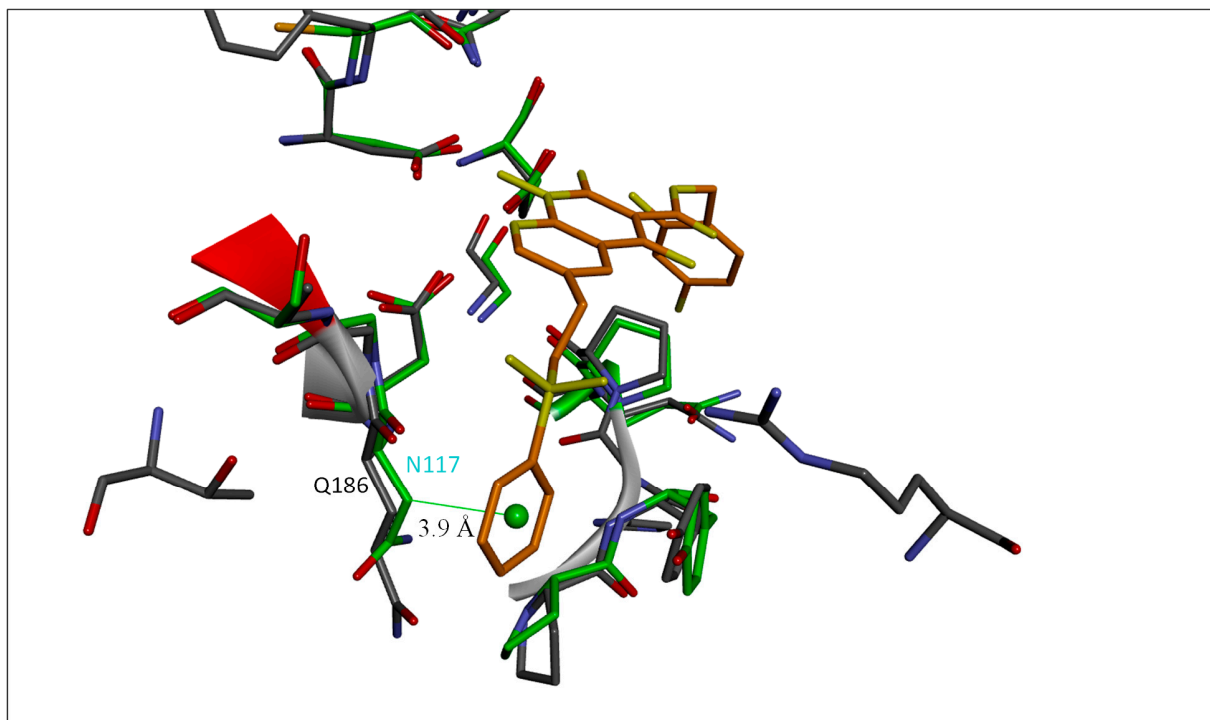

Figure S2. Nonpolar interactions between the CB of N117 of HIV-1 and Q186 of PFV with the sulfonylphenyl moiety of the extended 4f. The green sphere represents the centroid of the terminal benzene ring of 4f.

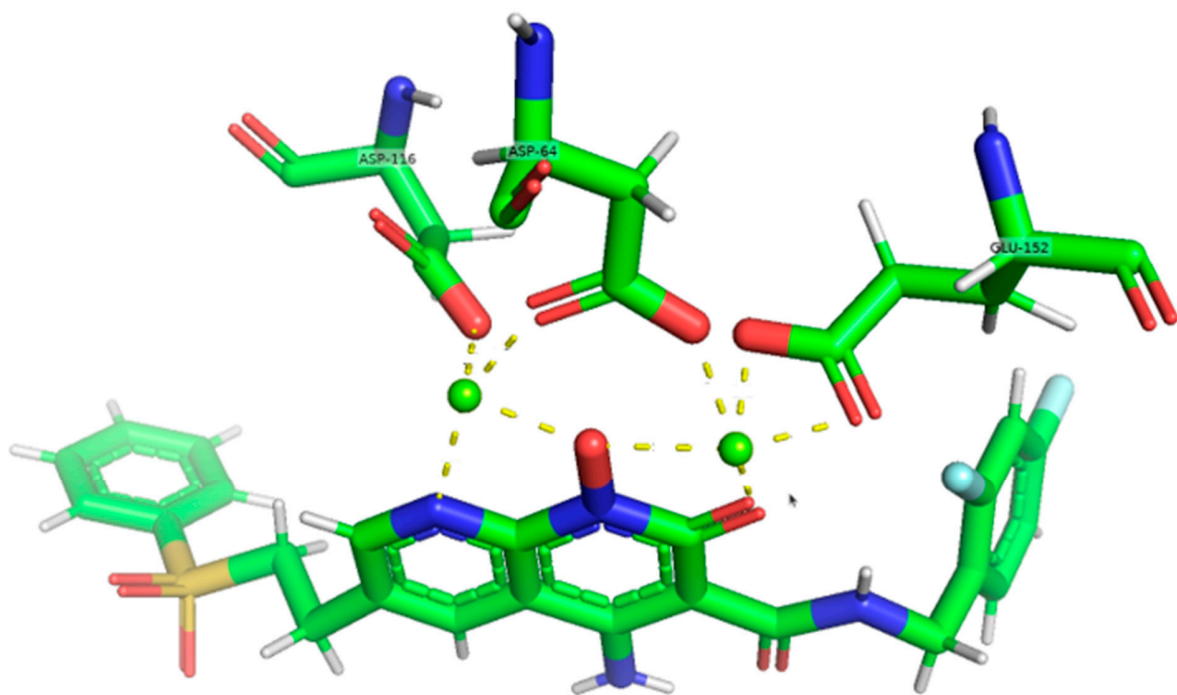

Figure S3. The HIV-1 IN active site carboxylates Asp64, Asp116, and Glu152 coordinate a pair of  $\text{Mg}^{2+}$  ions, which in turn interact with the metal-chelating core naphthyridine ring of the INSTIs 4f (bottom molecule)

Table S2. The bond, angle, corresponding force constants, the partial charge, and the VDW parameters generated by MCPB.py program with GAMESS-US for  $Mg^{2+}$  associated atoms in HIV-1 and PFV intasomes.

| Bond parameters for Different $Mg^{2+}$  | Atom1 Name |            | Atom2 Name | R eq(Å)        | Force Const. (kcal/mol*Å <sup>2</sup> )   |
|------------------------------------------|------------|------------|------------|----------------|-------------------------------------------|
| HIV-1 MG1                                | OD1        |            | MG         | 1.9747         | 73.8                                      |
|                                          | OD2        |            | MG         | 2.0337         | 56.7                                      |
|                                          | MG         |            | OAF        | 2.04           | 63.4                                      |
|                                          | MG         |            | NAV        | 2.2535         | 34                                        |
| HIV-1 MG2                                | OD2        |            | MG         | 1.9886         | 66                                        |
|                                          | OE2        |            | MG         | 2.0385         | 56                                        |
|                                          | OE1        |            | MG         | 2.0739         | 45.5                                      |
|                                          | MG         |            | OAC        | 2.0893         | 47.9                                      |
|                                          | MG         |            | OAF        | 2.0794         | 48.7                                      |
| PFV MG1                                  | OD1        |            | MG         | 1.9746         | 71.5                                      |
|                                          | OD2        |            | MG         | 2.0484         | 51.6                                      |
|                                          | MG         |            | OAF        | 2.0398         | 63                                        |
|                                          | MG         |            | NAV        | 2.2665         | 28.7                                      |
| PFV MG2                                  | OD2        |            | MG         | 1.9837         | 69.4                                      |
|                                          | OE2        |            | MG         | 2.044          | 53.2                                      |
|                                          | OE1        |            | MG         | 2.0703         | 46.5                                      |
|                                          | MG         |            | OAC        | 2.0886         | 46.5                                      |
|                                          | MG         |            | OAF        | 2.0785         | 48.9                                      |
| Angle parameters for Different $Mg^{2+}$ | Atom1 Name | Atom2 Name | Atom3 Name | Theta eq (Rad) | Force Const. (kcal/mol*Rad <sup>2</sup> ) |
| HIV-1 MG1                                | OD1        | MG         | OD2        | 115.51         | 32.65                                     |
|                                          | OD1        | MG         | OAF        | 91.96          | 57.16                                     |
|                                          | OD1        | MG         | NAV        | 132.3801       | 34.49                                     |
|                                          | CG         | OD1        | MG         | 137.3601       | 51.76                                     |
|                                          | OD2        | MG         | OAF        | 117.5801       | 56.9                                      |
|                                          | OD2        | MG         | NAV        | 111.37         | 64.84                                     |
|                                          | CG         | OD2        | MG         | 90.35          | 112.53                                    |
|                                          | MG         | OAF        | NBI        | 118.9801       | 73.23                                     |
|                                          | MG         | OAF        | MG         | 125.8301       | 54.8                                      |
|                                          | MG         | NAV        | CAP        | 120.7801       | 94.52                                     |
|                                          | MG         | NAV        | CBH        | 120.7801       | 94.52                                     |
|                                          | OAF        | MG         | NAV        | 73.27          | 53.5                                      |
|                                          | OD2        | MG         | OE1        | 103.97         | 69.57                                     |
|                                          | OD2        | MG         | OE2        | 116.8201       | 31.76                                     |

|           |     |     |     |          |        |
|-----------|-----|-----|-----|----------|--------|
| HIV-1 MG2 | OD2 | MG  | OAC | 133.0401 | 36.62  |
|           | OD2 | MG  | OAF | 89.03    | 59.84  |
|           | CG  | OD2 | MG  | 141.3901 | 55.29  |
|           | OE2 | MG  | OAC | 110.08   | 52     |
|           | OE2 | MG  | OAF | 113.85   | 71.21  |
|           | OE1 | MG  | OE2 | 63.26    | 127.45 |
|           | OE1 | MG  | OAC | 94.42    | 91.26  |
|           | OE1 | MG  | OAF | 166.6201 | 52.12  |
|           | CD  | OE1 | MG  | 87.84    | 125.83 |
|           | CD  | OE2 | MG  | 89.29    | 119.79 |
|           | MG  | OAF | MG  | 125.8301 | 54.8   |
|           | MG  | OAC | CBF | 118.7601 | 55.89  |
|           | MG  | OAF | NBI | 114.04   | 84.05  |
|           | OAC | MG  | OAF | 74       | 50.48  |
| PFV MG1   | OD1 | MG  | OD2 | 116.34   | 32.47  |
|           | OD1 | MG  | OAF | 90.14    | 56.2   |
|           | OD1 | MG  | NAV | 143.9901 | 39.35  |
|           | CG  | OD1 | MG  | 140.1601 | 52.54  |
|           | OD2 | MG  | OAF | 121.5801 | 47.21  |
|           | OD2 | MG  | NAV | 99.49    | 51.05  |
|           | CG  | OD2 | MG  | 89.46    | 118.25 |
|           | MG  | OAF | NBI | 119.3901 | 60.94  |
|           | MG  | OAF | MG  | 126.8701 | 49.9   |
|           | MG  | NAV | CAP | 120.6801 | 98.36  |
|           | MG  | NAV | CBH | 120.6801 | 98.36  |
|           | OAF | MG  | NAV | 72.93    | 57.55  |
| PFV MG2   | OD2 | MG  | OE1 | 104.32   | 70.41  |
|           | OD2 | MG  | OE2 | 116.4    | 17.21  |
|           | OD2 | MG  | OAC | 137.5401 | 17.75  |
|           | OD2 | MG  | OAF | 89.38    | 63.27  |
|           | CG  | OD2 | MG  | 139.0801 | 33.99  |
|           | OE2 | MG  | OAC | 106.06   | 43.29  |
|           | OE2 | MG  | OAF | 112.39   | 61.5   |
|           | OE1 | MG  | OE2 | 63.26    | 129.05 |
|           | OE1 | MG  | OAC | 94.19    | 84.98  |
|           | OE1 | MG  | OAF | 166.1901 | 62.78  |
|           | CD  | OE1 | MG  | 88.03    | 125.33 |
|           | CD  | OE2 | MG  | 89.06    | 119.33 |
|           | MG  | OAF | MG  | 126.8701 | 49.9   |

|                                         |             |                   |      |          |      |
|-----------------------------------------|-------------|-------------------|------|----------|------|
|                                         | MG          | OAC               | CBF  | 118.4101 | 54.8 |
|                                         | MG          | OAF               | NBI  | 113.72   | 76.6 |
|                                         | OAC         | MG                | OAF  | 74.06    | 63.1 |
| VdW parameters and charge for $Mg^{2+}$ | LJ Radius/Å | LJ Depth/kcal/mol | Mass | Charge   |      |
| HIV-1 MG1                               | 1.373       | 0.0118            | 24.3 | 1.5414   |      |
| HIV-1 MG2                               | 1.373       | 0.0118            | 24.3 | 1.6172   |      |
| PFV MG1                                 | 1.373       | 0.0118            | 24.3 | 1.508    |      |
| PFV MG2                                 | 1.373       | 0.0118            | 24.3 | 1.542    |      |

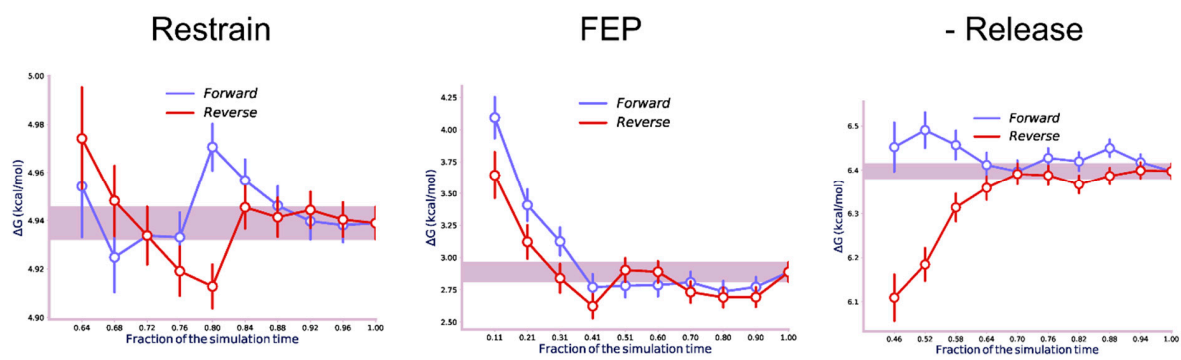

Figure S4. Time evolution of the free energies (with error bars) for the three stages of transformation of 4f from extended to bent bound to PFV Q186N. Data from the last 10 ns of simulations were analyzed both chronologically (“forward”) and in a time-reversed manner (“reverse”).



## Restrain

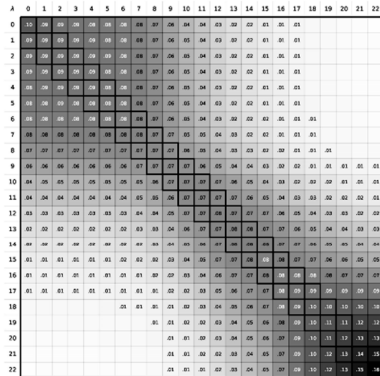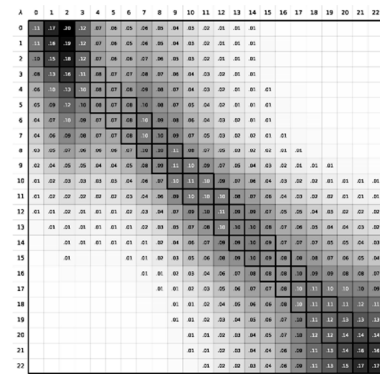

## Release

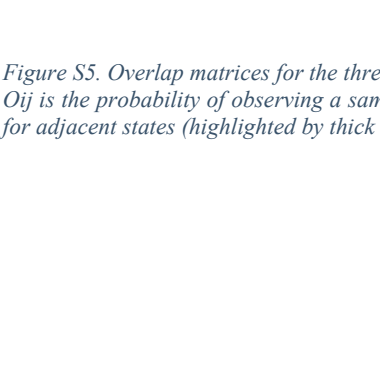

## FEP

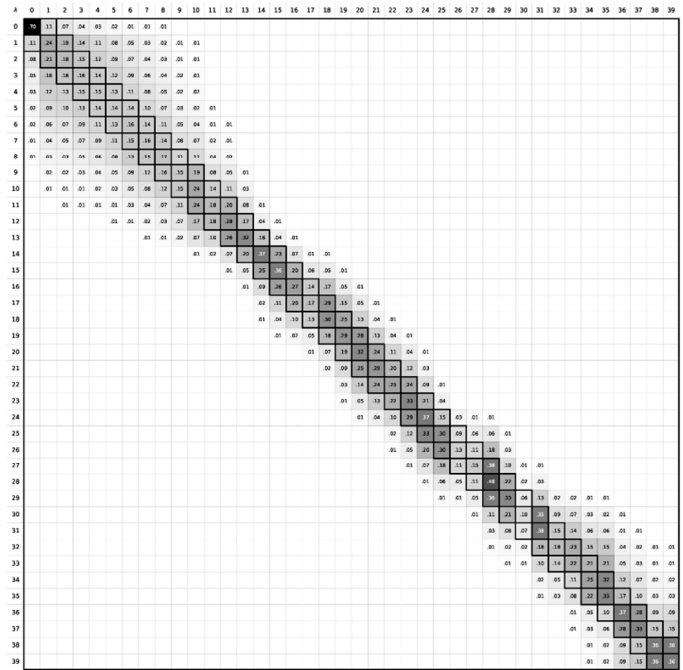

Figure S5. Overlap matrices for the three stages of transformation of 4f from extended to bent bound to PFV Q186N. The element  $O_{ij}$  is the probability of observing a sample from state  $i$  ( $i$ th row) in state  $j$  ( $j$ th column). The recommended minimum probability for adjacent states (highlighted by thick black lines) is 0.03.

# Extended-4f-HIV-1

A

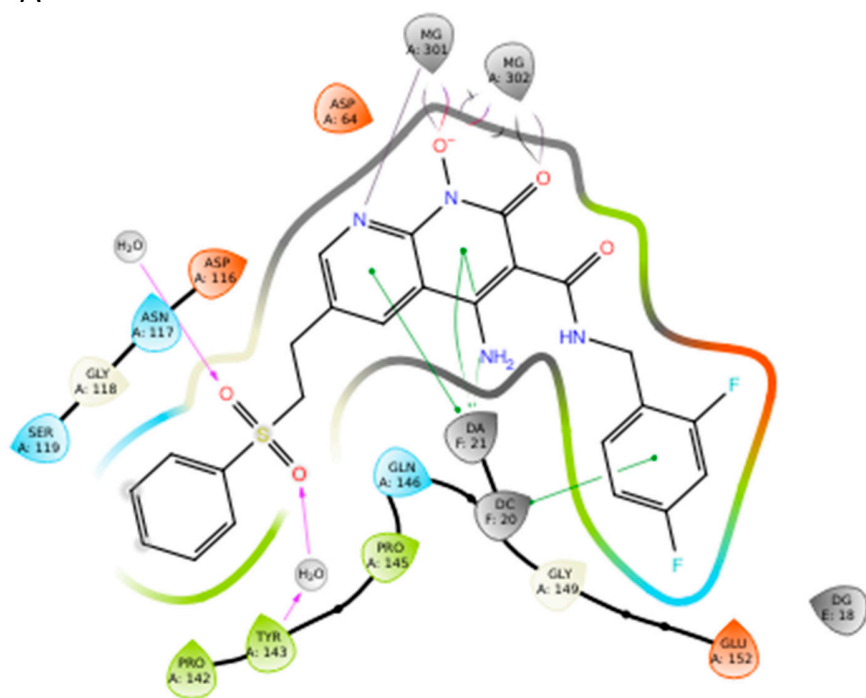

# Bent-4f-PFV

B

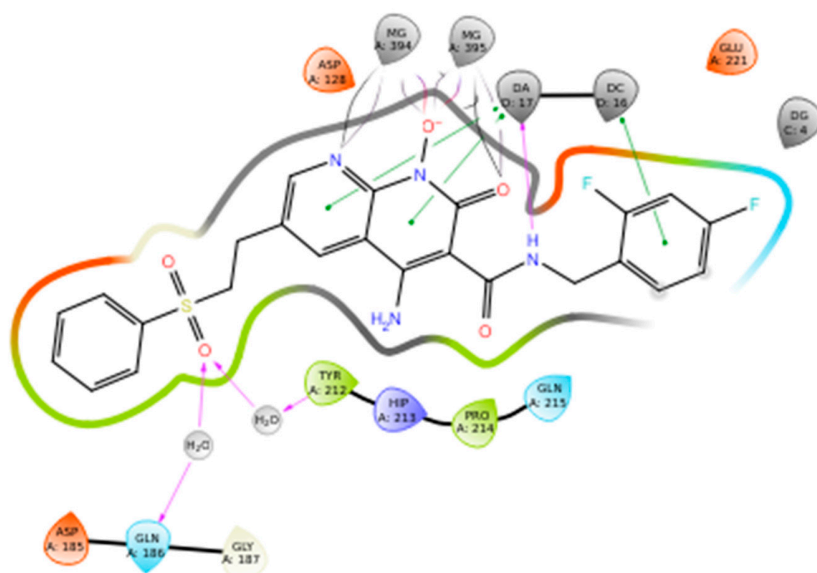

*Figure S6. 2D ligand interaction diagrams of (A) Extended 4f-HIV-1 and (B) bent 4f-PFV (right) complexes. The two diagrams are calculated using the Schrodinger Inc's Maestro software.*
